# Supplementary material for: Computational Prediction of Intronic microRNA Targets using Host Gene Expression Reveals Novel Regulatory Mechanisms
Source: PLoS One. 2011 Jun 9;6(6):e19312. doi: 10.1371/journal.pone.0019312 (PMC3111417; doi:10.1371/journal.pone.0019312)
Supplement: Table S1 — List of GDS data for analysis. The identifiers of Gene Datasets (GDS) retrieved from the Gene Expression Omnibus repository. (XLS) [file pone.0019312.s010.xls]

## Sheet: Sheet1
Gene Datasets (GDS) identifires
1036
1050
1062
1063
1064
1067
1096
1204
1209
1215
1220
1230
1250
1253
1257
1282
1284
1286
1287
1288
1295
1304
1312
1313
1314
1317
1321
1324
1326
1327
1329
1331
1333
1340
1353
1362
1373
1375
1376
1380
1384
1390
1392
1397
1401
1407
1414
1423
1438
1447
1453
1476
1477
1478
1479
1480
1499
1503
1505
1542
1543
1548
1549
1615
1618
1630
1637
1663
1664
1684
1688
1713
1736
1746
1750
1758
1780
1783
1791
1806
1841
1942
1965
1971
1975
1979
2039
2055
2057
2113
2175
2190
2191
2367
266
268
287
289
395
420
472
484
493
505
513
525
534
536
552
559
561
562
564
596
649
686
690
731
737
738
748
756
761
785
810
820
826
834
855
858
860
885
901
906
916
917
940
946
962
987
