# Supplementary material for: Computational Prediction of Intronic microRNA Targets using Host Gene Expression Reveals Novel Regulatory Mechanisms
Source: PLoS One. 2011 Jun 9;6(6):e19312. doi: 10.1371/journal.pone.0019312 (PMC3111417; doi:10.1371/journal.pone.0019312)
Supplement: Table S2 — The excel file contains all intronic-host genes pairs. Data are retrieved from MirBase v.15. (XLS) [file pone.0019312.s011.xls]

## Sheet: Sheet1
Intronic miRNA	Hosts	UTR length	# introns	# targets
hsa-let-7c	C21orf34	616	9	0
hsa-let-7f-2	HUWE1	517	5	1
hsa-let-7g	WDR82	3067	3	41
hsa-mir-1-1	C20orf166	80	3	0
hsa-mir-101-2	RCL1	789	5	2
hsa-mir-103-1	PANK3	1945	1	29
hsa-mir-103-2	PANK2	560	6	0
hsa-mir-105-1	GABRA3	1065	2	4
hsa-mir-105-2	GABRA3	1065	2	4
hsa-mir-106b	MCM7	150	8	0
hsa-mir-107	PANK1	1413	5	15
hsa-mir-10a	HOXB3	1462	5	33
hsa-mir-10b	HOXD3	824	1	0
hsa-mir-1180	B9D1	148	7	0
hsa-mir-1183	SP4	3262	3	14
hsa-mir-1184-1	F8	1801	1	2
hsa-mir-1200	ELMO1	1194	14	13
hsa-mir-1201	CCNB1IP1	178	5	0
hsa-mir-1203	SKAP1	384	1	1
hsa-mir-1224	VWA5B2	NA	6	0
hsa-mir-1225	PKD1	1016	6	22
hsa-mir-1226	DHX30	72	7	0
hsa-mir-1227	PLEKHJ1	683	2	6
hsa-mir-1228	AC137834	NA	1	0
hsa-mir-1229	MGAT4B	939	3	10
hsa-mir-1231	NAV1	7037	8	39
hsa-mir-1233-1	GOLGA8A	2339	4	8
hsa-mir-1233-2	GOLGA8B	2530	3	3
hsa-mir-1234	CPSF1	85	1	0
hsa-mir-1236	RDBP	378	14	0
hsa-mir-1237	RPS6KA4	734	2	23
hsa-mir-1238	ATG4D	350	1	5
hsa-mir-1243	ANK2	2258	4	15
hsa-mir-1245	COL3A1	972	3	15
hsa-mir-1248	EIF4A2	625	13	10
hsa-mir-1249	C22orf9	4933	9	13
hsa-mir-1250	AATK	1636	2	17
hsa-mir-1252	SYT1	1936	3	49
hsa-mir-1254	CCAR1	284	3	1
hsa-mir-1255a	PPP3CA	2434	3	25
hsa-mir-1255b-2	IQWD1	406	8	6
hsa-mir-1256	EIF4G3	835	9	1
hsa-mir-1258	ZNF385B	1265	1	10
hsa-mir-1259	C20orf199	NA	8	0
hsa-mir-125b-2	C21orf34	616	9	0
hsa-mir-126	EGFL7	391	5	0
hsa-mir-1262	GPR177	865	6	4
hsa-mir-1264	HTR2C	2646	3	15
hsa-mir-1266	MYO5C	1578	2	2
hsa-mir-1267	FAM155A	1965	1	17
hsa-mir-1270-1	AC078899	NA	1	0
hsa-mir-1270-2	AC078899	NA	1	0
hsa-mir-1271	ARL10	1605	1	14
hsa-mir-1272	RBPMS2	1109	1	16
hsa-mir-1273	RGS22	194	2	1
hsa-mir-1273c	RBM16	663	1	6
hsa-mir-1273d	KIF1B	4990	5	25
hsa-mir-1276	KLHL25	1706	1	3
hsa-mir-1277	WDR44	971	5	19
hsa-mir-1278	CDC73	1214	4	3
hsa-mir-128-1	R3HDM1	974	8	7
hsa-mir-128-2	ARPP-21	1856	8	8
hsa-mir-1280	EEFSEC	386	2	1
hsa-mir-1282	SERINC4	32	1	0
hsa-mir-1284	FOXP1	3660	9	66
hsa-mir-1285-1	AC000120	NA	10	0
hsa-mir-1286	RTN4R	293	6	5
hsa-mir-1288	PIGL	360	6	0
hsa-mir-1289-1	GDF5	557	1	3
hsa-mir-1289-2	FSTL4	2634	2	18
hsa-mir-1290	ALDH4A1	1412	6	4
hsa-mir-1291	C12orf41	831	2	3
hsa-mir-1292	NOP56	NA	6	0
hsa-mir-1293	LIMA1	1283	2	8
hsa-mir-1294	GALNT10	3277	3	12
hsa-mir-1296	JMJD1C	814	2	21
hsa-mir-1298	HTR2C	2646	3	15
hsa-mir-1301	DNMT3A	1295	5	12
hsa-mir-1302-2	RP11-34P13	NA	1	0
hsa-mir-1302-4	AC007879	NA	1	0
hsa-mir-1302-5	C20orf175	NA	3	0
hsa-mir-1304	TAF1D	NA	2	0
hsa-mir-1307	USMG5	113	3	0
hsa-mir-1322	SOX7	1966	2	9
hsa-mir-133a-2	C20orf166	80	2	0
hsa-mir-135a-1	RP11-168J18	NA	2	0
hsa-mir-135b	LEMD1	349	2	0
hsa-mir-139	PDE2A	1231	7	2
hsa-mir-140	WWP2	1800	3	8
hsa-mir-1469	NR2F2	1190	4	31
hsa-mir-147b	SPATA5L1	203	1	0
hsa-mir-148b	COPZ1	1326	2	3
hsa-mir-149	GPC1	1788	4	5
hsa-mir-151	PTK2	1063	6	4
hsa-mir-152	COPZ2	258	1	0
hsa-mir-153-1	PTPRN	600	7	0
hsa-mir-153-2	PTPRN2	1652	5	5
hsa-mir-1537	LYST	1891	6	21
hsa-mir-15a	DLEU2	NA	6	0
hsa-mir-15b	SMC4	1142	15	1
hsa-mir-16-1	DLEU2	NA	6	0
hsa-mir-16-2	SMC4	1142	15	1
hsa-mir-17	MIRHG1	NA	1	0
hsa-mir-181a-1	RP11-31E23	NA	1	0
hsa-mir-181a-2	MIR181A2HG	NA	1	0
hsa-mir-181b-1	RP11-31E23	NA	1	0
hsa-mir-181b-2	MIR181A2HG	NA	1	0
hsa-mir-185	C22orf25	1262	16	0
hsa-mir-186	ZRANB2	1823	3	10
hsa-mir-188	CLCN5	6987	5	62
hsa-mir-18a	MIRHG1	NA	1	0
hsa-mir-190	TLN2	4020	4	17
hsa-mir-1908	FADS1	2701	9	3
hsa-mir-1909	REXO1	793	1	8
hsa-mir-191	DALRD3	297	4	1
hsa-mir-1910	C16orf74	489	1	1
hsa-mir-1911	HTR2C	2646	3	15
hsa-mir-1912	HTR2C	2646	3	15
hsa-mir-1913	RPS6KA2	3395	5	38
hsa-mir-1914	UCKL1	140	4	0
hsa-mir-1915	C10orf114	1107	1	4
hsa-mir-195	AC027763	NA	1	0
hsa-mir-196a-1	HOXB7	601	1	3
hsa-mir-196b	HOXA9	1163	2	23
hsa-mir-1976	RPS6KA1	828	5	27
hsa-mir-199a-2	RP5-1116C7	NA	1	0
hsa-mir-19a	MIRHG1	NA	1	0
hsa-mir-19b-1	MIRHG1	NA	1	0
hsa-mir-204	TRPM3	902	18	4
hsa-mir-205	CTA-55I10	NA	1	0
hsa-mir-208a	MYH6	49	2	0
hsa-mir-208b	MYH7	114	2	0
hsa-mir-20a	MIRHG1	NA	1	0
hsa-mir-211	TRPM1	472	3	0
hsa-mir-2115	SPINK8	145	1	0
hsa-mir-2116	MYO1E	1014	1	8
hsa-mir-216a	AC011306	NA	1	0
hsa-mir-216b	AC011306	NA	1	0
hsa-mir-217	AC011306	NA	1	0
hsa-mir-218-1	SLIT2	154	2	0
hsa-mir-218-2	SLIT3	176	4	1
hsa-mir-224	GABRE	1576	5	9
hsa-mir-2276	SPATA13	1137	3	0
hsa-mir-2278	C9orf3	482	8	1
hsa-mir-2355	KLF7	407	5	2
hsa-mir-23b	C9orf3	482	11	1
hsa-mir-24-1	C9orf3	482	10	1
hsa-mir-25	MCM7	150	8	0
hsa-mir-26a-1	CTDSPL	3601	6	42
hsa-mir-26a-2	CTDSP2	3673	2	28
hsa-mir-26b	CTDSP1	1515	11	6
hsa-mir-27b	C9orf3	482	11	1
hsa-mir-28	LPP	5131	4	34
hsa-mir-2909	AATF	206	1	0
hsa-mir-301a	SKA2	NA	2	0
hsa-mir-301b	PPIL2	1148	1	4
hsa-mir-30a	C6orf155	NA	2	0
hsa-mir-30c-1	NFYC	775	20	9
hsa-mir-30c-2	AL136164	NA	3	0
hsa-mir-30e	NFYC	775	20	9
hsa-mir-31	RP11-354P17	NA	1	0
hsa-mir-3115	KDM1	NA	2	0
hsa-mir-3116-1	INADL	2976	9	6
hsa-mir-3117	SGIP1	1966	10	15
hsa-mir-3118-1	AL583842	NA	1	0
hsa-mir-3118-2	BX571672	NA	6	0
hsa-mir-3118-3	BX004987	NA	5	0
hsa-mir-3119-2	METTL11B	NA	2	0
hsa-mir-3120	DNM3	4875	4	13
hsa-mir-3121	ACBD6	131	1	0
hsa-mir-3122	DTL	1904	5	2
hsa-mir-3125	TRIB2	1939	2	30
hsa-mir-3126	ANTXR1	3683	7	10
hsa-mir-3127	CNNM4	2372	3	16
hsa-mir-3128	NFE2L2	479	11	4
hsa-mir-3129	COL5A2	2153	3	17
hsa-mir-3130-2	FASTKD2	702	4	0
hsa-mir-3130-4	FASTKD2	702	4	0
hsa-mir-3131	IHH	781	1	13
hsa-mir-3133	FARP2	715	2	0
hsa-mir-3134	ANKRD28	3030	7	26
hsa-mir-3135	KAT2B	1879	2	30
hsa-mir-3136	TMF1	3347	4	18
hsa-mir-3137	C3orf21	1428	8	2
hsa-mir-3138	WDR1	1038	5	19
hsa-mir-3139	GAB1	936	2	13
hsa-mir-3140	FBXW7	1622	1	45
hsa-mir-3145	NHSL1	NA	4	0
hsa-mir-3146	TWISTNB	2853	1	5
hsa-mir-3150	C8orf38	773	1	0
hsa-mir-3151	BAALC	2203	6	1
hsa-mir-3152	ADAMTSL1	2401	5	18
hsa-mir-3153	CKS2	277	1	0
hsa-mir-3155	PFKFB3	2587	3	26
hsa-mir-3156-1	RP11-432I13	NA	1	0
hsa-mir-3156-2	AP006565	NA	4	0
hsa-mir-3156-3	AL050302	NA	1	0
hsa-mir-3157	RP11-429G19	NA	6	0
hsa-mir-3158-1	DPCD	NA	6	0
hsa-mir-3160-1	AMBRA1	1035	6	7
hsa-mir-3161	PTPRJ	3480	3	37
hsa-mir-3162	OSBP	2178	2	16
hsa-mir-3163	PC	372	3	5
hsa-mir-3164	TPCN2	2651	4	2
hsa-mir-3165	NUMA1	661	4	3
hsa-mir-3170	FARP1	1445	4	30
hsa-mir-3172	AKAP6	3257	2	31
hsa-mir-3173	DICER1	4268	2	60
hsa-mir-3174	ZNF710	964	1	15
hsa-mir-3175	CHD2	3301	3	29
hsa-mir-3176	SOLH	1118	1	16
hsa-mir-3177	MAPK8IP3	1492	2	9
hsa-mir-3181	CYLD	5427	3	39
hsa-mir-3182	CDH13	1562	2	12
hsa-mir-3183	ABR	2559	3	21
hsa-mir-3189	GDF15	241	2	0
hsa-mir-3191	BBC3	973	5	15
hsa-mir-3192	POLR3F	1082	5	6
hsa-mir-3194	NFATC2	210	4	0
hsa-mir-3196	BIRC7	252	5	0
hsa-mir-3198	BID	1439	8	5
hsa-mir-3199-2	RP3-477H23	NA	16	0
hsa-mir-32	C9orf5	5324	5	36
hsa-mir-3200	OSBP2	1485	9	5
hsa-mir-3202-1	TMEM187	347	3	0
hsa-mir-320b-2	NVL	290	9	0
hsa-mir-320e	PRKD2	206	4	0
hsa-mir-326	ARRB1	724	2	3
hsa-mir-330	EML2	260	1	2
hsa-mir-335	MEST	1232	12	14
hsa-mir-338	AATK	1636	3	17
hsa-mir-339	C7orf50	618	8	0
hsa-mir-33a	SREBF2	709	7	0
hsa-mir-33b	SREBF1	549	11	1
hsa-mir-340	RNF130	179	2	0
hsa-mir-342	EVL	497	2	0
hsa-mir-346	GRID1	2717	2	20
hsa-mir-361	CHM	3448	2	3
hsa-mir-362	CLCN5	6987	5	62
hsa-mir-374a	NCRNA00182	NA	4	0
hsa-mir-378	PPARGC1B	146	6	15
hsa-mir-383	SGCZ	577	1	3
hsa-mir-423	CCDC55	793	3	1
hsa-mir-425	DALRD3	297	4	1
hsa-mir-4251	PRDM16	4785	6	53
hsa-mir-4254	BAI2	301	11	2
hsa-mir-4257	ADAMTSL4	738	3	0
hsa-mir-4258	CKS1B	469	6	1
hsa-mir-4259	CCDC19	118	4	6
hsa-mir-4260	LAMB3	397	4	3
hsa-mir-4263	BRE	414	8	1
hsa-mir-4270	COLQ	1404	13	9
hsa-mir-4274	SORCS2	2573	3	0
hsa-mir-4281	SNCB	600	2	5
hsa-mir-4285	SH2B2	80	1	0
hsa-mir-4287	SCARA5	1700	2	5
hsa-mir-4290	RP11-406A20	NA	1	0
hsa-mir-4292	C9orf86	665	14	8
hsa-mir-4293	FRMD4A	3331	2	58
hsa-mir-4295	VTI1A	3359	3	25
hsa-mir-4296	CTBP2	1667	4	17
hsa-mir-4297	EBF3	2645	3	39
hsa-mir-4301	DRD2	1130	3	5
hsa-mir-4304	PITPNM2	2546	4	37
hsa-mir-4306	CLYBL	152	6	2
hsa-mir-4308	GCH1	1046	7	4
hsa-mir-4310	SPTBN5	469	1	0
hsa-mir-4312	ANP32A	213	6	3
hsa-mir-4313	AC019294	NA	1	0
hsa-mir-4317	L3MBTL4	1513	3	9
hsa-mir-4320	MYO5B	3739	2	25
hsa-mir-4324	SLC6A16	485	2	0
hsa-mir-4326	ARFGAP1	1916	5	0
hsa-mir-4327	KRTAP13-2	294	1	0
hsa-mir-4329	AMOT	3689	4	26
hsa-mir-448	HTR2C	2646	3	15
hsa-mir-449a	CDC20B	1222	5	2
hsa-mir-449b	CDC20B	1222	5	2
hsa-mir-449c	CDC20B	1222	5	2
hsa-mir-452	GABRE	1576	7	9
hsa-mir-454	SKA2	NA	2	0
hsa-mir-455	COL27A1	NA	6	0
hsa-mir-483	INS	72	12	0
hsa-mir-486	ANK1	2537	11	25
hsa-mir-488	ASTN1	3215	6	14
hsa-mir-489	CALCR	1868	7	32
hsa-mir-490	CHRM2	758	9	18
hsa-mir-491	KIAA1797	326	2	0
hsa-mir-497	AC027763	NA	1	0
hsa-mir-499	MYH7B	245	1	0
hsa-mir-500	CLCN5	6987	5	62
hsa-mir-500b	CLCN5	6987	5	62
hsa-mir-501	CLCN5	6987	5	62
hsa-mir-502	CLCN5	6987	5	62
hsa-mir-503	AC004383	NA	4	0
hsa-mir-504	FGF13	1274	6	2
hsa-mir-505	ATP11C	2556	2	25
hsa-mir-511-1	MRC1L1	696	2	2
hsa-mir-511-2	MRC1	697	1	2
hsa-mir-532	CLCN5	6987	5	62
hsa-mir-544b	UMPS	1109	8	0
hsa-mir-545	NCRNA00182	NA	4	0
hsa-mir-548b	FAM184A	NA	6	0
hsa-mir-548c	RASSF3	498	2	2
hsa-mir-548d-1	ATAD2	1282	1	21
hsa-mir-548e	SHOC2	1846	4	24
hsa-mir-548f-1	PCDH15	757	25	0
hsa-mir-548f-2	ERBB4	7897	6	61
hsa-mir-548f-3	TMEM232	NA	2	0
hsa-mir-548f-5	DMD	2604	9	43
hsa-mir-548h-3	HS3ST3A1	507	1	1
hsa-mir-548j	TPST2	525	8	0
hsa-mir-548k	PPFIA1	1405	2	19
hsa-mir-548l	MRE11A	2823	4	5
hsa-mir-548n	DPY19L1	2691	1	16
hsa-mir-548p	ST8SIA4	4642	1	32
hsa-mir-548s	LPIN1	2614	6	9
hsa-mir-548t	GALNT7	2250	1	46
hsa-mir-548u	PRIM2	665	4	0
hsa-mir-548v	MTUS1	2130	4	38
hsa-mir-548w	HS3ST4	1439	2	15
hsa-mir-548x	AL109763	NA	3	0
hsa-mir-550-1	ZNRF2	1680	2	9
hsa-mir-550-2	AVL9	NA	1	0
hsa-mir-551a	MEGF6	2579	2	3
hsa-mir-551b	C3orf50	NA	1	0
hsa-mir-553	RTCD1	267	2	6
hsa-mir-554	RP11-74C1	NA	6	0
hsa-mir-555	ASH1L	2397	4	44
hsa-mir-556	NOS1AP	940	1	4
hsa-mir-558	BIRC6	994	3	28
hsa-mir-559	EPCAM	NA	5	0
hsa-mir-561	GULP1	1912	10	10
hsa-mir-562	DIS3L2	568	7	2
hsa-mir-564	KIF15	516	1	0
hsa-mir-566	SEMA3F	959	8	5
hsa-mir-567	C3orf52	1476	7	11
hsa-mir-569	TNIK	NA	8	0
hsa-mir-570	AC069513	NA	5	0
hsa-mir-571	ZNF141	1394	1	0
hsa-mir-574	FAM114A1	246	1	4
hsa-mir-575	SCD5	1789	3	26
hsa-mir-576	SEC24B	783	2	0
hsa-mir-577	UGT8	308	2	1
hsa-mir-578	CPE	720	2	0
hsa-mir-579	ZFR	1409	2	2
hsa-mir-580	LMBRD2	733	1	6
hsa-mir-581	ARL15	1776	1	10
hsa-mir-582	PDE4D	5599	2	57
hsa-mir-584	SH3TC2	22502	2	28
hsa-mir-585	SLIT3	176	1	1
hsa-mir-586	SUPT3H	1081	5	6
hsa-mir-589	FBXL18	5972	6	6
hsa-mir-590	EIF4H	1791	3	7
hsa-mir-591	SLC25A13	969	3	0
hsa-mir-592	GRM8	515	10	6
hsa-mir-593	SND1	548	4	4
hsa-mir-595	PTPRN2	1652	6	5
hsa-mir-597	TNKS	5609	1	27
hsa-mir-598	XKR6	1804	1	13
hsa-mir-600	STRBP	555	1	23
hsa-mir-601	DENND1A	1777	6	11
hsa-mir-602	EHMT1	1171	1	4
hsa-mir-603	KIAA1217	1519	11	24
hsa-mir-604	SVIL	898	3	4
hsa-mir-605	PRKG1	1614	4	23
hsa-mir-606	C10orf11	80	1	2
hsa-mir-608	SEMA4G	1484	3	30
hsa-mir-609	C10orf79	249	6	0
hsa-mir-611	C11orf10	113	1	0
hsa-mir-613	APOLD1	3811	1	8
hsa-mir-615	HOXC5	866	2	4
hsa-mir-616	DDIT3	218	1	2
hsa-mir-617	LIN7A	335	1	2
hsa-mir-618	LIN7A	335	1	2
hsa-mir-619	SSH1	793	2	11
hsa-mir-620	MED13L	2687	1	24
hsa-mir-621	SLC25A15	443	1	4
hsa-mir-623	UBAC2	1092	9	0
hsa-mir-624	STRN3	1611	2	23
hsa-mir-625	FUT8	833	5	6
hsa-mir-626	AC073657	NA	2	0
hsa-mir-627	VPS39	2051	2	9
hsa-mir-628	CCPG1	4064	3	11
hsa-mir-629	TLE3	1892	4	7
hsa-mir-634	PRKCA	6701	2	18
hsa-mir-635	WIPI1	491	1	0
hsa-mir-636	SFRS2	2045	1	12
hsa-mir-637	DAPK3	646	2	0
hsa-mir-638	DNM2	856	6	16
hsa-mir-640	GATAD2A	3458	10	21
hsa-mir-641	AKT2	3554	5	18
hsa-mir-642	GIPR	524	1	0
hsa-mir-643	ZNF766	1525	2	0
hsa-mir-644	ITCH	3598	3	21
hsa-mir-646	RP5-1043L13	NA	3	0
hsa-mir-647	UCKL1	140	4	0
hsa-mir-648	MICAL3	3081	7	17
hsa-mir-649	TOP3B	81	1	0
hsa-mir-650	SC-9C5	NA	2	0
hsa-mir-652	TMEM164	94	4	0
hsa-mir-653	CALCR	1868	7	32
hsa-mir-657	AATK	1636	3	17
hsa-mir-660	CLCN5	6987	5	62
hsa-mir-661	PLEC1	1023	5	2
hsa-mir-663	RP3-410C9	NA	2	0
hsa-mir-663b	NCRNA00164	NA	1	0
hsa-mir-664	RAB3GAP2	865	4	1
hsa-mir-670	AC023085	NA	1	0
hsa-mir-671	CSGLCA-T	NA	1	0
hsa-mir-675	H19	NA	1	0
hsa-mir-7-1	HNRNPK	1172	10	5
hsa-mir-7-3	C19orf30	NA	1	0
hsa-mir-708	ODZ4	4774	1	20
hsa-mir-711	COL7A1	332	3	4
hsa-mir-744	MAP2K4	2473	2	35
hsa-mir-761	NRD1	41	5	0
hsa-mir-762	CTF1	1020	1	0
hsa-mir-764	HTR2C	2646	3	15
hsa-mir-765	ARHGEF11	1158	5	11
hsa-mir-766	2006-09-01	NA	11	12
hsa-mir-767	GABRA3	1065	2	4
hsa-mir-770	MEG3	NA	8	0
hsa-mir-874	KLHL3	4597	2	36
hsa-mir-877	ABCF1	1658	5	0
hsa-mir-885	ATP2B2	2752	10	45
hsa-mir-887	FBXL7	2605	1	6
hsa-mir-9-1	C1orf61	290	16	0
hsa-mir-921	RP11-9L18	NA	6	0
hsa-mir-92a-1	MIRHG1	NA	1	0
hsa-mir-93	MCM7	150	8	0
hsa-mir-933	ATF2	328	18	5
hsa-mir-934	VGLL1	265	6	0
hsa-mir-938	SVIL	898	4	4
hsa-mir-941-1	DNAJC5	2473	3	8
hsa-mir-941-2	DNAJC5	2473	3	8
hsa-mir-941-3	DNAJC5	2473	3	8
hsa-mir-942	TTF2	1303	2	0
hsa-mir-944	TP63	2777	14	32
hsa-mir-95	ABLIM2	1678	8	1
hsa-mir-98	HUWE1	517	5	1
hsa-mir-99a	C21orf34	616	9	0
